# Supplementary material
Source: PubMed Central journal article supplement (PMC3256414)
Supplement: mt2011209x2.pdf [file mt2011209x2.pdf]

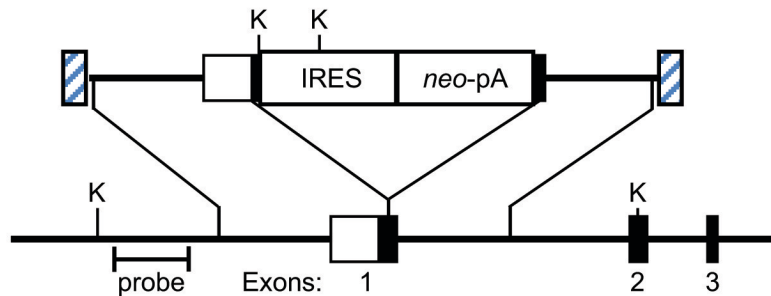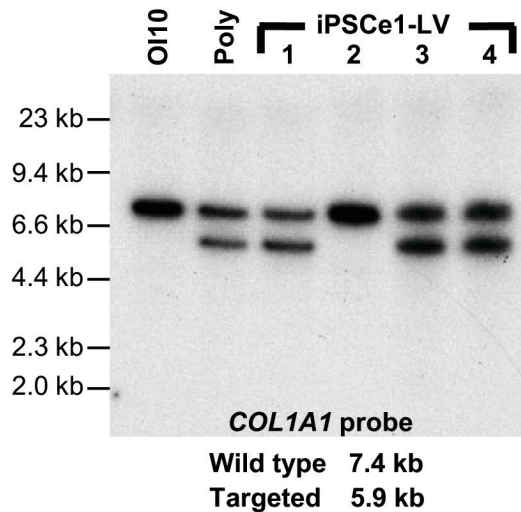

**Supplemental Figure 2. iPSCs derived from OI MSCs targeted at *COL1A1*.** Southern blot identifying iPSC clones targeted at *COL1A1*. K, *Kpn*I; *neo*, neomycin resistance gene; pA, polyadenylation site; OI10, parental MSC culture of OIMSC10 cells; Poly, polyclonal G418-resistant MSCs transduced with the AAV gene targeting vector. Three of four iPSC clones produced by LV reprogramming vectors were targeted at *COL1A1*.
