# Supplementary material
Source: PubMed Central journal article supplement (PMC3256414)
Supplement: mt2011209x3.pdf [file mt2011209x3.pdf]

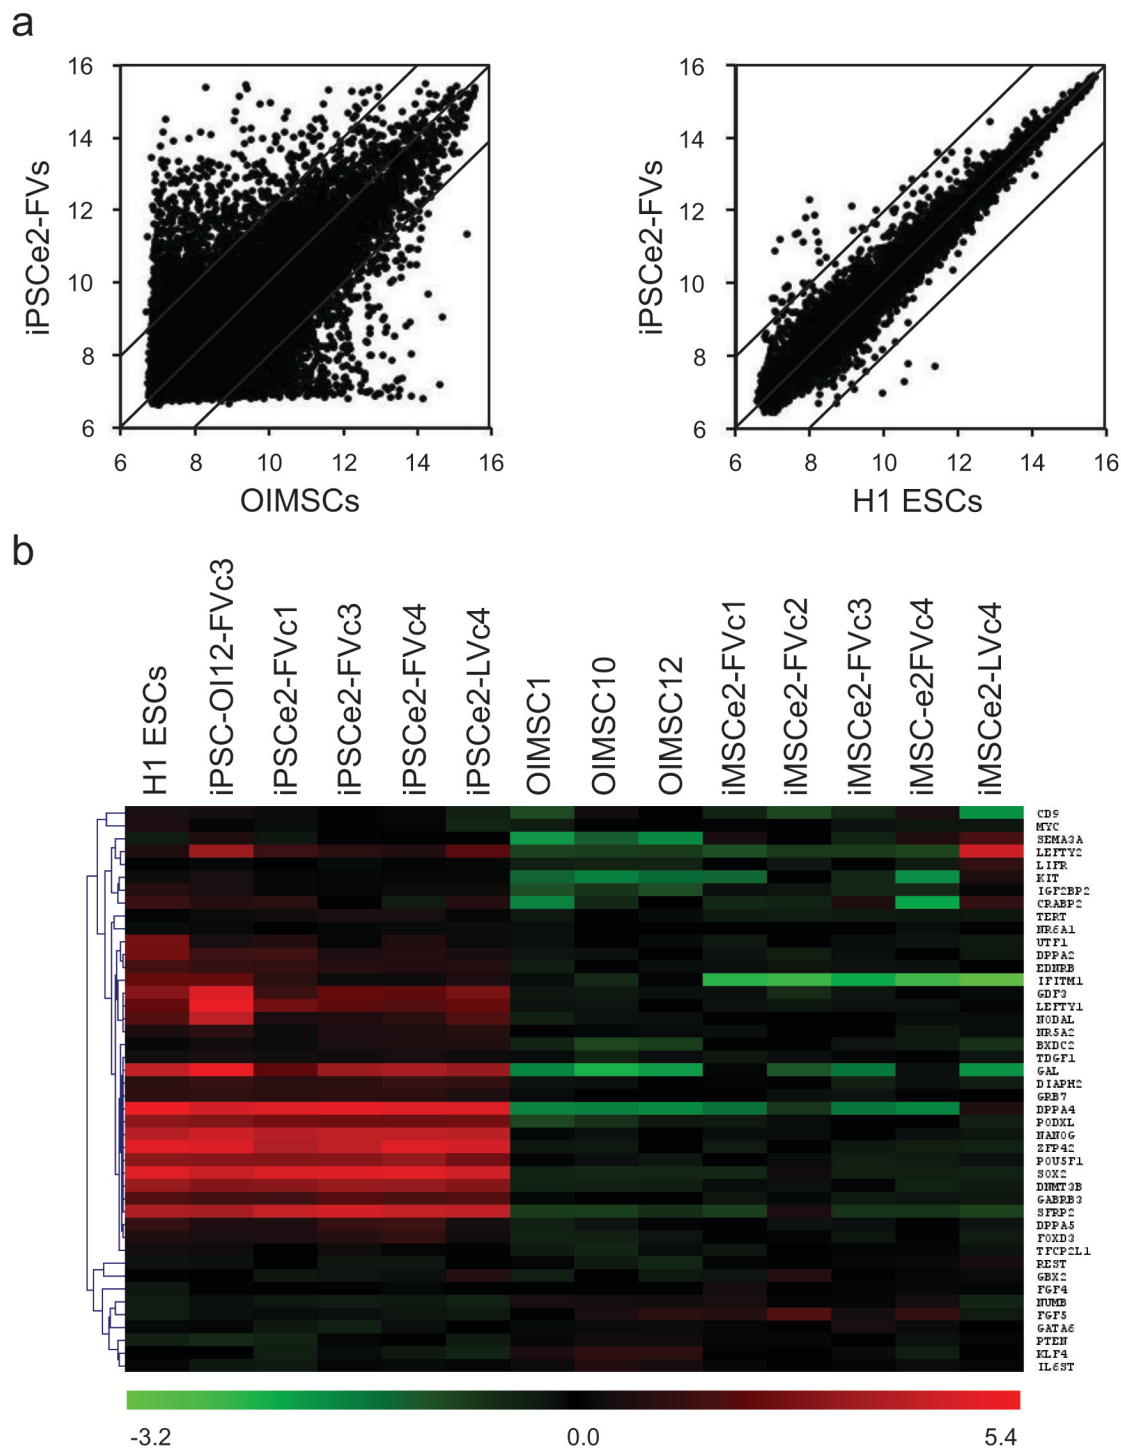

**Supplemental Figure 3. Global and pluripotency gene expression analysis of ESCs, iPSCs, MSCs, and iMSCs.** **a**, Global gene expression profile of iPSCe2-FV lines shown as scatter plots against OIMSC lines and H1 ESCs. **b**, Heatmap of microarray data showing the median-centered, log<sub>2</sub> expression values of genes that have previously been shown to be associated with undifferentiated ESCs<sup>51,52</sup> in the indicated cell lines.
