# Supplementary material
Source: PubMed Central journal article supplement (PMC3256414)
Supplement: mt2011209x4.pdf [file mt2011209x4.pdf]

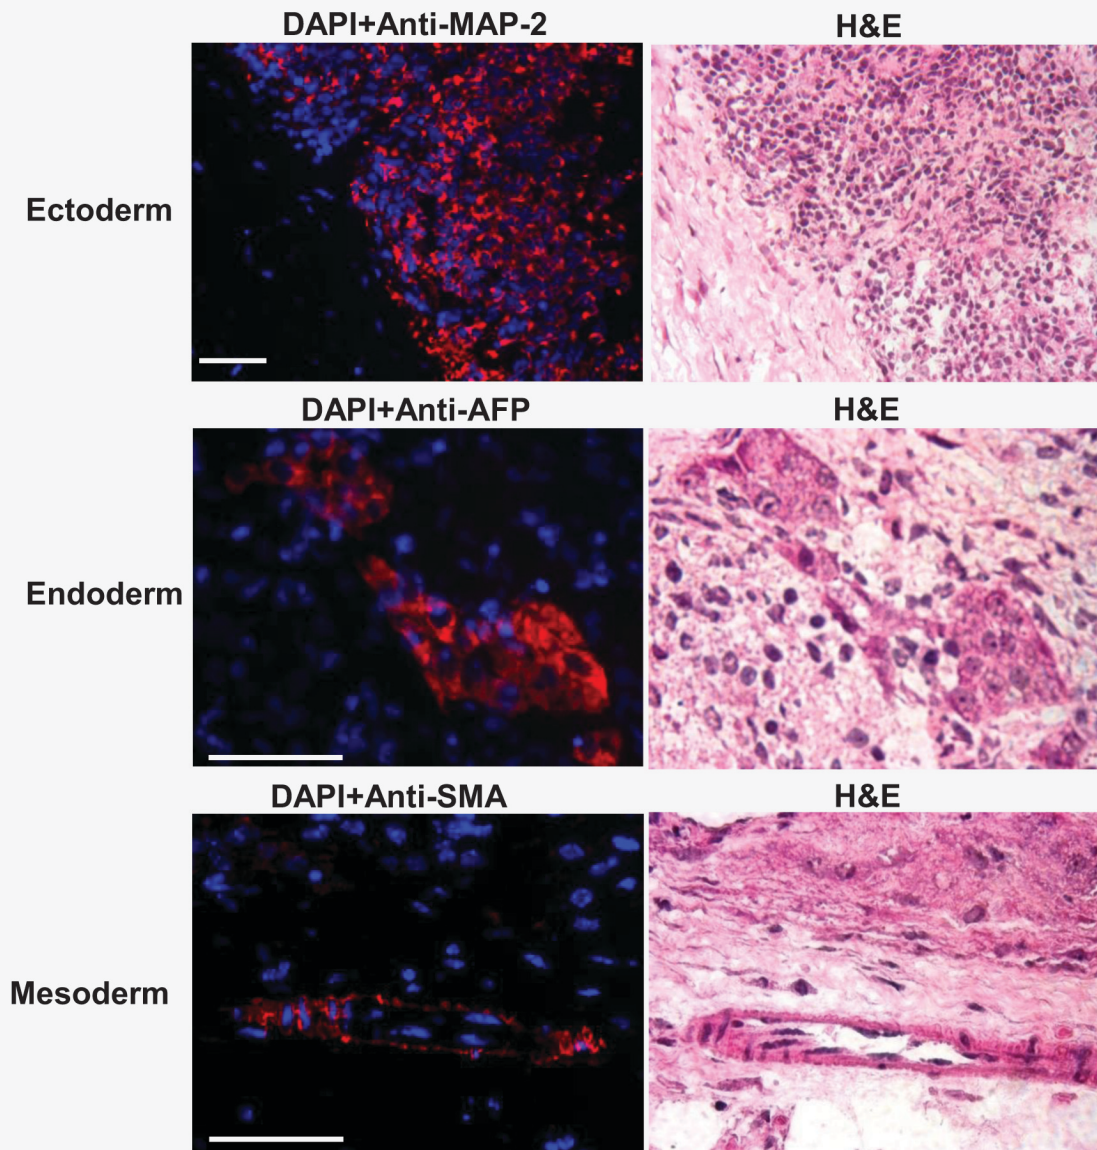

**Supplemental Figure 4. Trilineage teratoma assay of iPSCe2-LVc4.** Serial histological sections of a teratoma produced by iPSCe2-LVc4 cells stained with hematoxylin and eosin (H&E) or DAPI plus antibodies against MAP-2 (microtubule associated protein-2) for ectoderm, AFP ( $\alpha$ -fetoprotein) for endoderm, and SMA ( $\alpha$ -smooth muscle actin) for mesoderm. Bar = 50 microns.
