# Supplementary material
Source: PubMed Central journal article supplement (PMC3256414)
Supplement: mt2011209x5.pdf [file mt2011209x5.pdf]

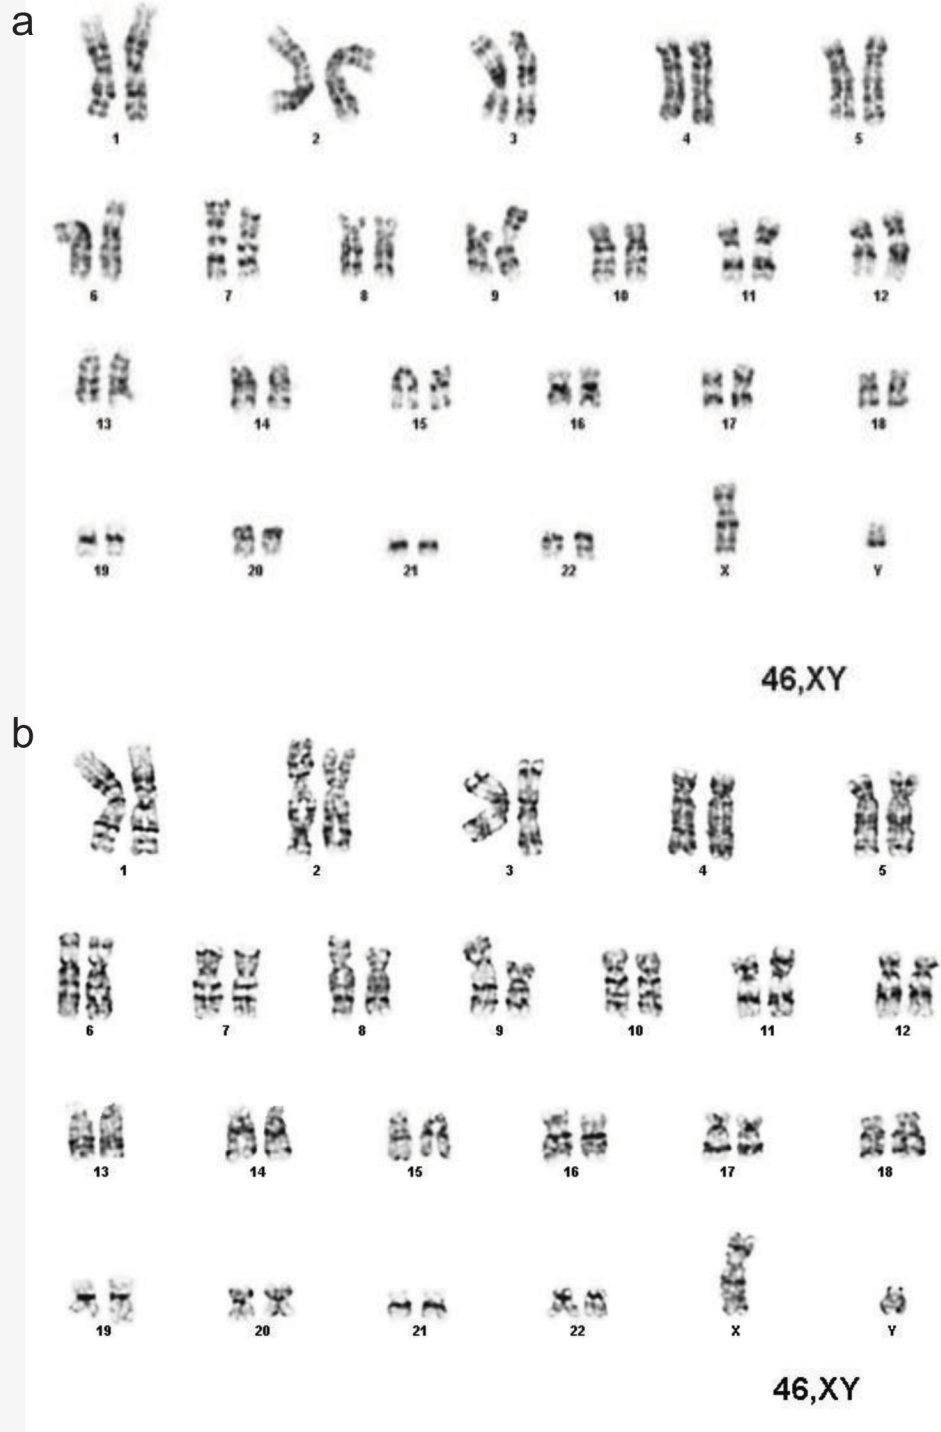

**Supplemental Figure 5. Normal karyotypes of iPSCe2-FV cell lines. a, Karyotype from iPSCe2-FVc3. b, Karyotype from iPSCe2-FVc7.**
