# Supplementary material
Source: PubMed Central journal article supplement (PMC3256414)
Supplement: mt2011209x6.pdf [file mt2011209x6.pdf]

**a Lentiviral Vectors**

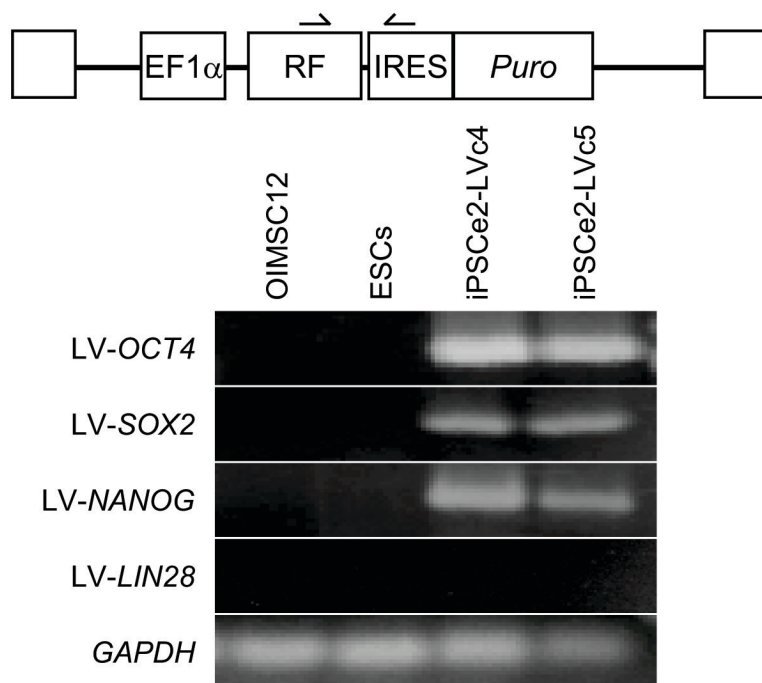

**b  $\Delta\Phi$ 53MOSKMETNW**

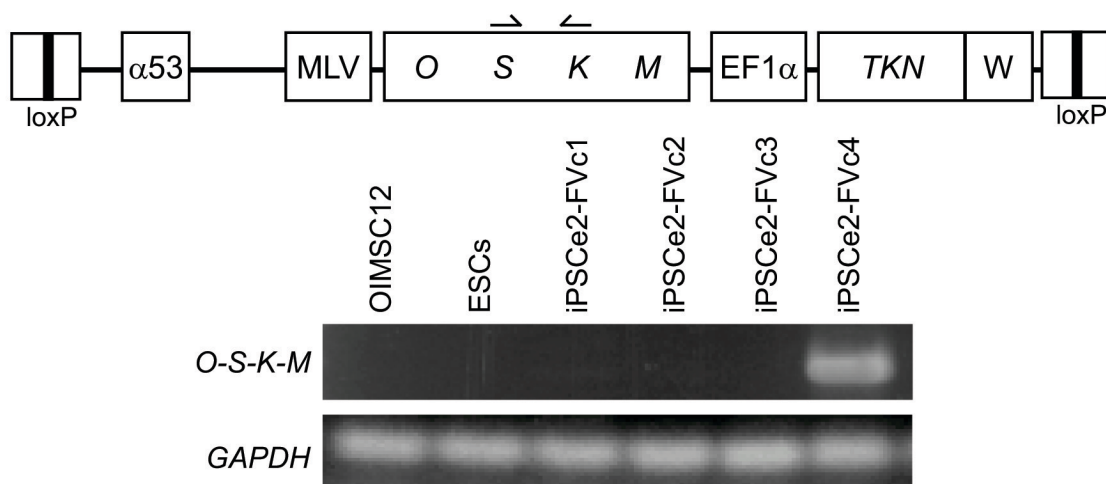

**Supplemental Figure 6. Expression of reprogramming transgenes in iPSCs.** **a**, Schematic of the lentiviral reprogramming vectors as described in Supplemental Figure 1 showing the location of RT-PCR primers (arrows) displayed above the RT-PCR data showing expression of lentiviral transgenes, LV-OCT4, LV-SOX, LV-NANOG, and LV-LIN28 as well as GAPDH control in iPSCe2-LV clones, parental OI MSCs, and H1 ESCs. **b**, Diagram of FV vector  $\Delta\Phi$ 53MOSKMETNW as described in Supplemental Figure 1 showing the location of RT-PCR primers (arrows) illustrated above the RT-PCR data detecting expression of the FV polycistronic transcript (O-S-K-M) and GAPDH control in iPSCe2-FV clones, parental OI MSCs, and H1 ESCs.
