# Supplementary material
Source: PubMed Central journal article supplement (PMC3256414)
Supplement: mt2011209x7.pdf [file mt2011209x7.pdf]

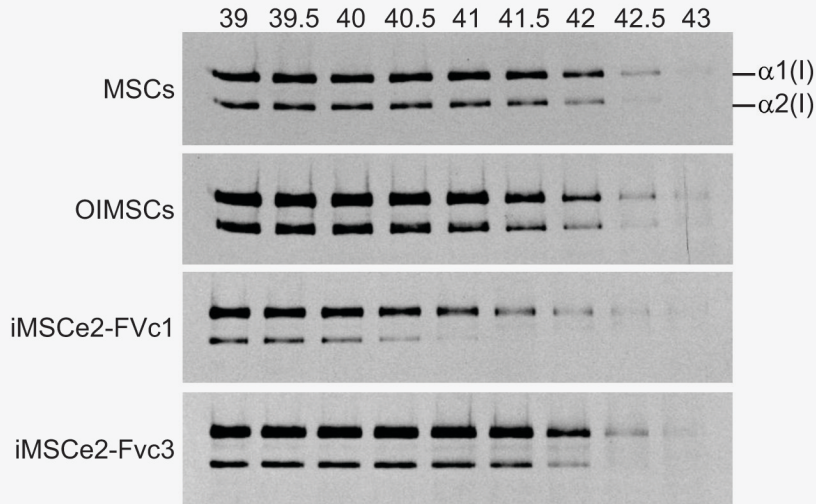

**Supplemental Figure 7. Collagen thermostability.** SDS-PAGE analysis of [ $^3\text{H}$ ]-proline-labeled collagen peptides following protease digestion of molecules from normal MSCs, untransduced OIMSC12 cells, iMSCe2-FVc1 cells targeted at the WT allele, and iMSCe2-FVc3 cells targeted at the mutant allele. Temperatures used prior to protease treatment are indicated above each lane (39-43°C). Targeting at the mutant allele restores thermostability in collagen produced by iMSCe2-FVc3 cells.
