# Supplementary material
Source: PubMed Central journal article supplement (PMC3256414)
Supplement: mt2011209x8.pdf [file mt2011209x8.pdf]

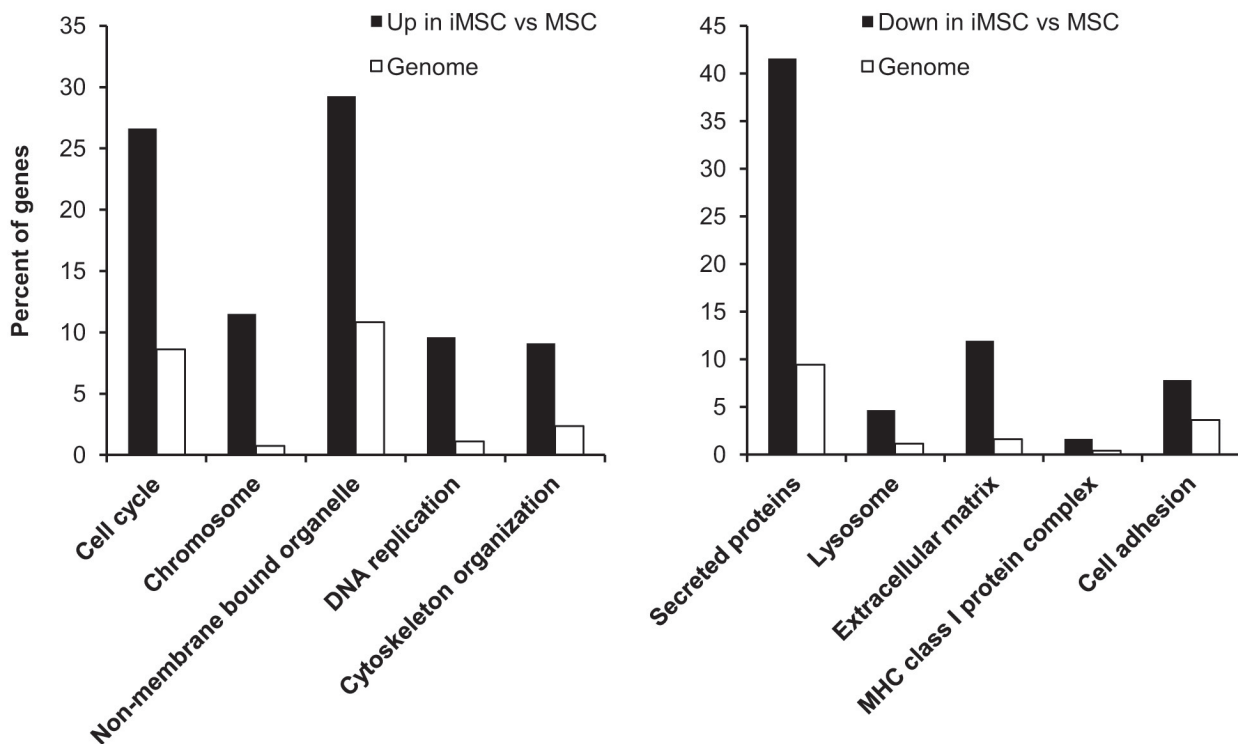

**Supplemental Figure 8. Gene ontology analysis of differentially expressed genes in iMSCs compared to MSCs.** The top 5 most significant categories determined by gene ontology analysis from subsets of genes >2-fold up- or down-regulated in iMSCs vs MSCs. Percentages of genes present in each category are shown compared to the percent of all genes (Genome).
