# Supplementary material
Source: PubMed Central journal article supplement (PMC3256414)
Supplement: mt2011209x9.pdf [file mt2011209x9.pdf]

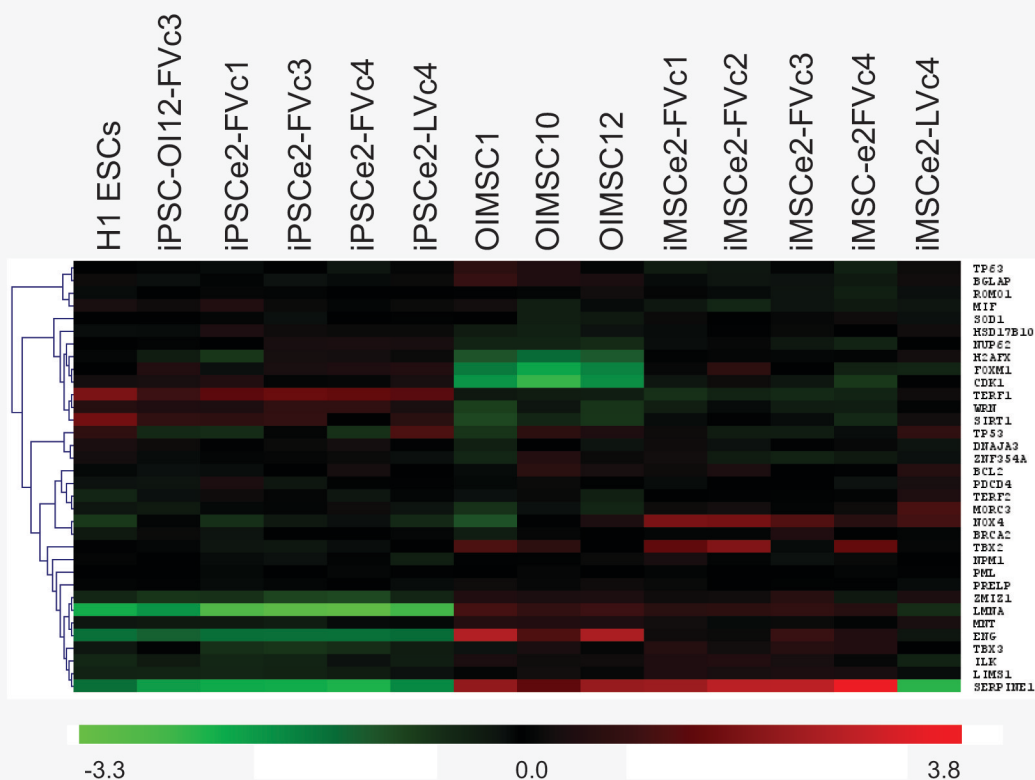

**Supplemental Figure 9. Expression of cell aging genes.** Heatmap based on microarray results showing the median-centered, log<sub>2</sub> expression values of genes associated with the GO term “cell aging” in H1 ESCs, untargeted OI iPSCs (iPSC-OI12-FVc3), four gene-targeted iPSC lines, three OI MSC lines, and five gene-targeted iMSC lines.
