# Supplementary material
Source: PubMed Central journal article supplement (PMC3256414)
Supplement: mt2011209x10.pdf [file mt2011209x10.pdf]

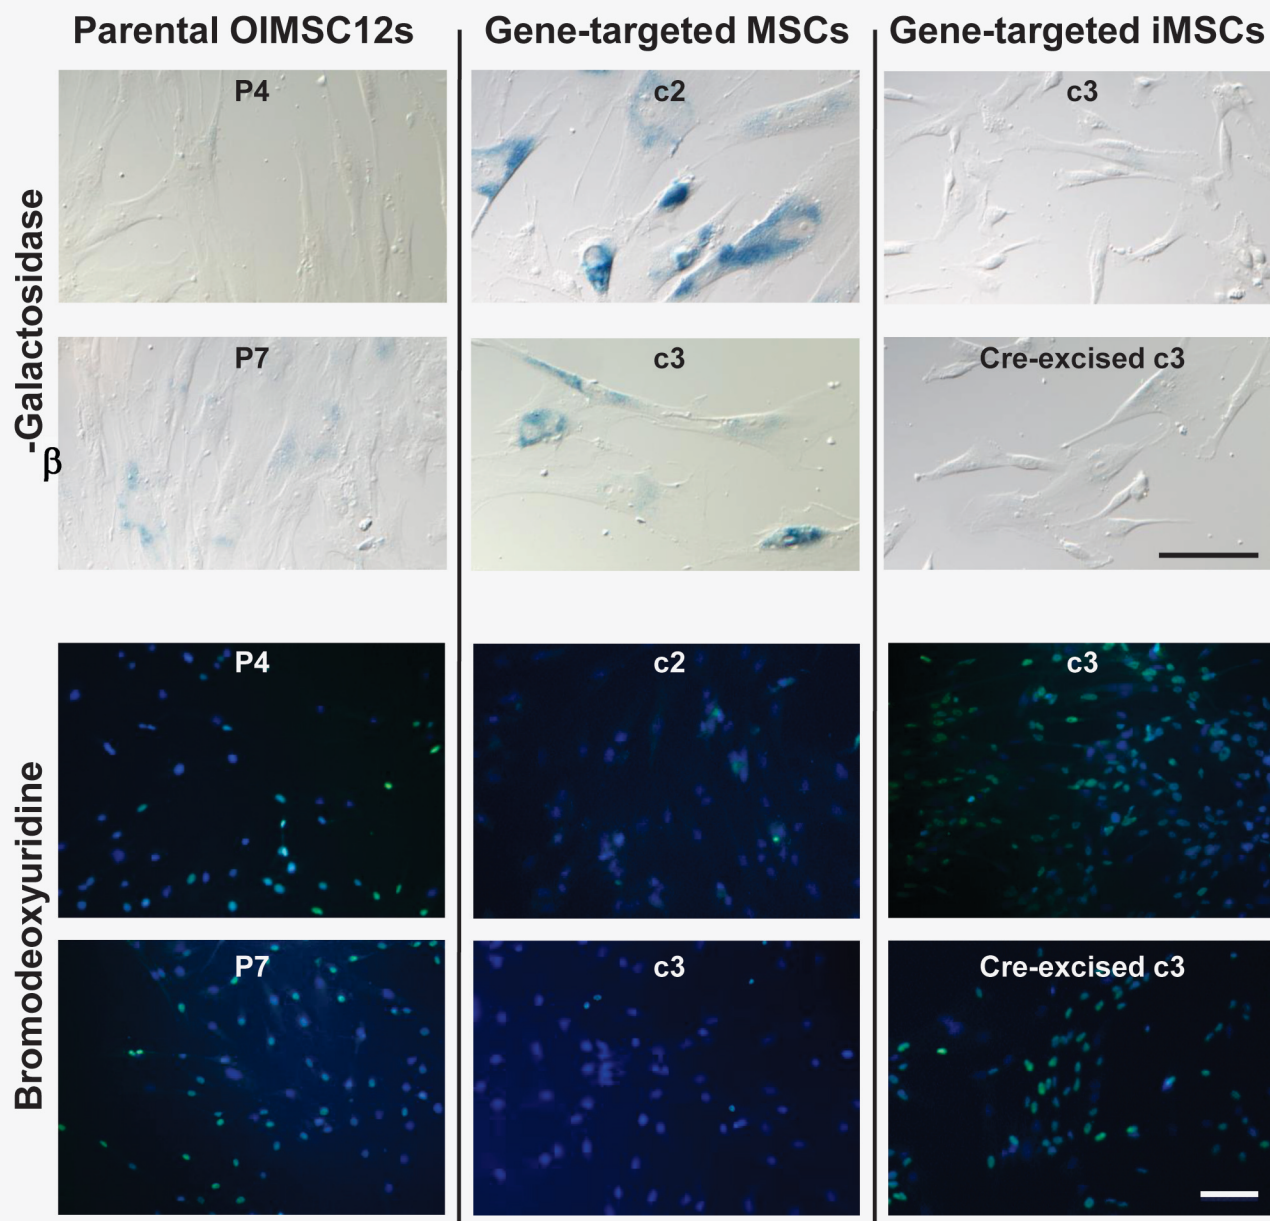

**Supplemental Figure 10. Senescence-associated  $\beta$ -galactosidase ( $\beta$ -Gal) staining and bromodeoxyuridine (BrdU) incorporation.** Parental OIMSC12 cells at passage 4 (P4) or 7 (P7), gene-targeted MSC clones 2 (c2) and 3 (c3), gene-targeted iMSC clone 3 (c3), and a transgene-free, gene-targeted iMSC clone 3 (Cre-excised c3), were stained for  $\beta$ -Gal activity at pH 6.0 to detect senescence-associated  $\beta$ -Gal, or stained with DAPI and anti-BrdU antibody (blue and green nuclear signals respectively) after 24 hours of culture in the presence of BrdU. Bar sizes: 100  $\mu$ m. Cell lines and clones are the same as those shown in Figures 3f and 3g.
