# Supplementary material
Source: PubMed Central journal article supplement (PMC3256414)
Supplement: mt2011209x11.pdf [file mt2011209x11.pdf]

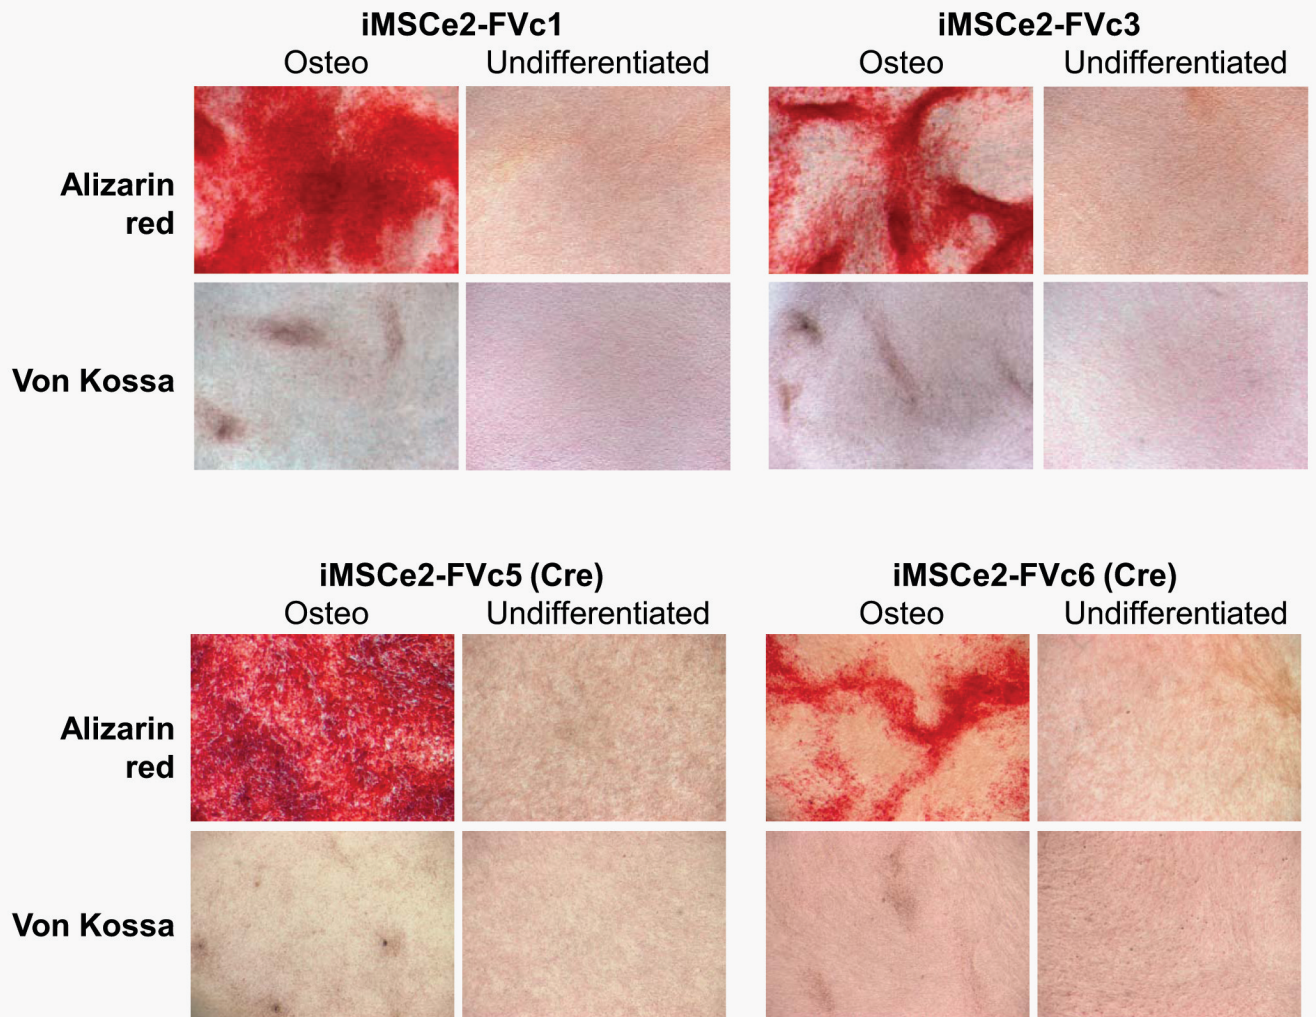

**Supplemental Figure 11. Calcium and phosphate deposition by iMSCe2-FV clones.** Alizarin red and Von Kossa staining of gene-targeted iMSC clones (iMSCe2-FVc1 and iMSCe2-FVc3) and transgene-free (Cre-treated), gene-targeted iMSC clones (iMSCe2-FVc5 and iMSCe2-FVc6) cells grown in osteogenic medium (osteo) or MSC medium (undifferentiated).
