# Supplementary material
Source: PubMed Central journal article supplement (PMC3256414)
Supplement: mt2011209x12.pdf [file mt2011209x12.pdf]

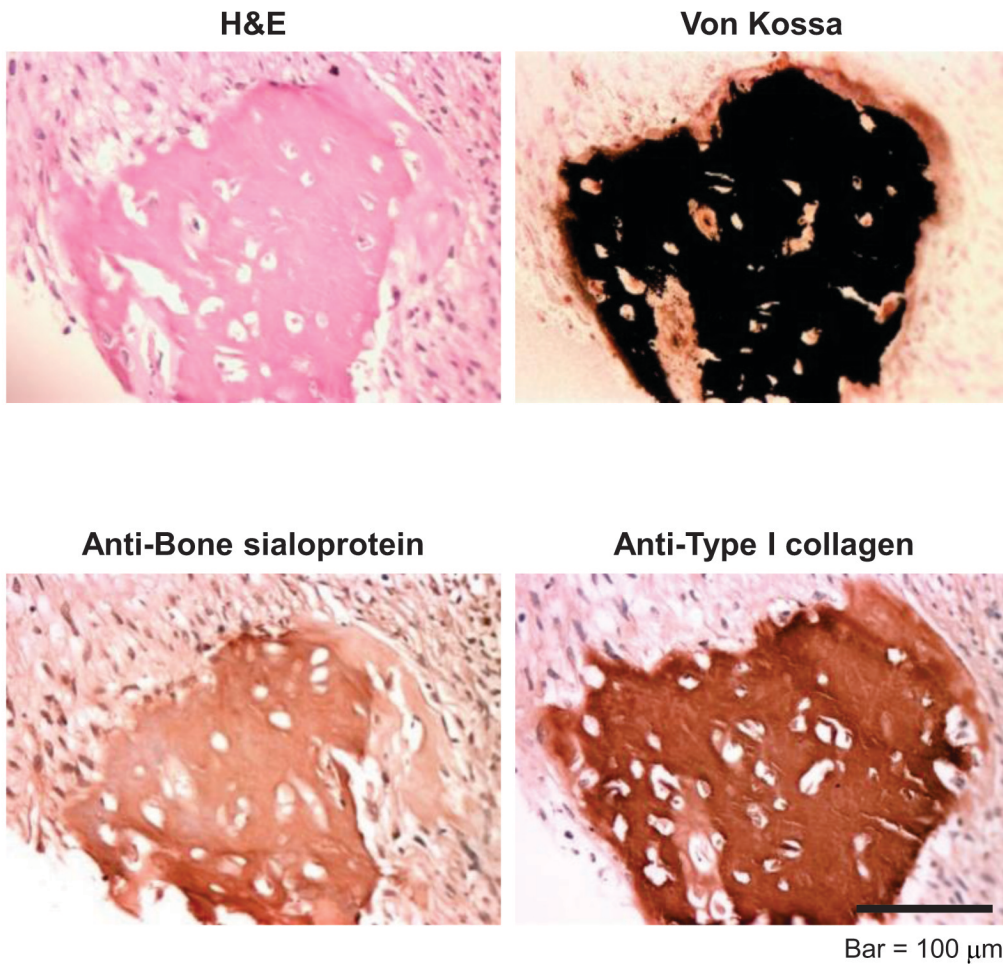

**Supplemental Figure 12. Gene-targeted iPSCs form bone in teratomas.** Serial sections of teratoma produced by iPSCe2-LVc4 stained with hematoxylin and eosin (H&E), Von Kossa, and antibodies against human bone sialoprotein and human type I collagen. Bar = 100 microns.
