# Supplementary material
Source: PubMed Central journal article supplement (PMC3256414)
Supplement: mt2011209x13.pdf [file mt2011209x13.pdf]

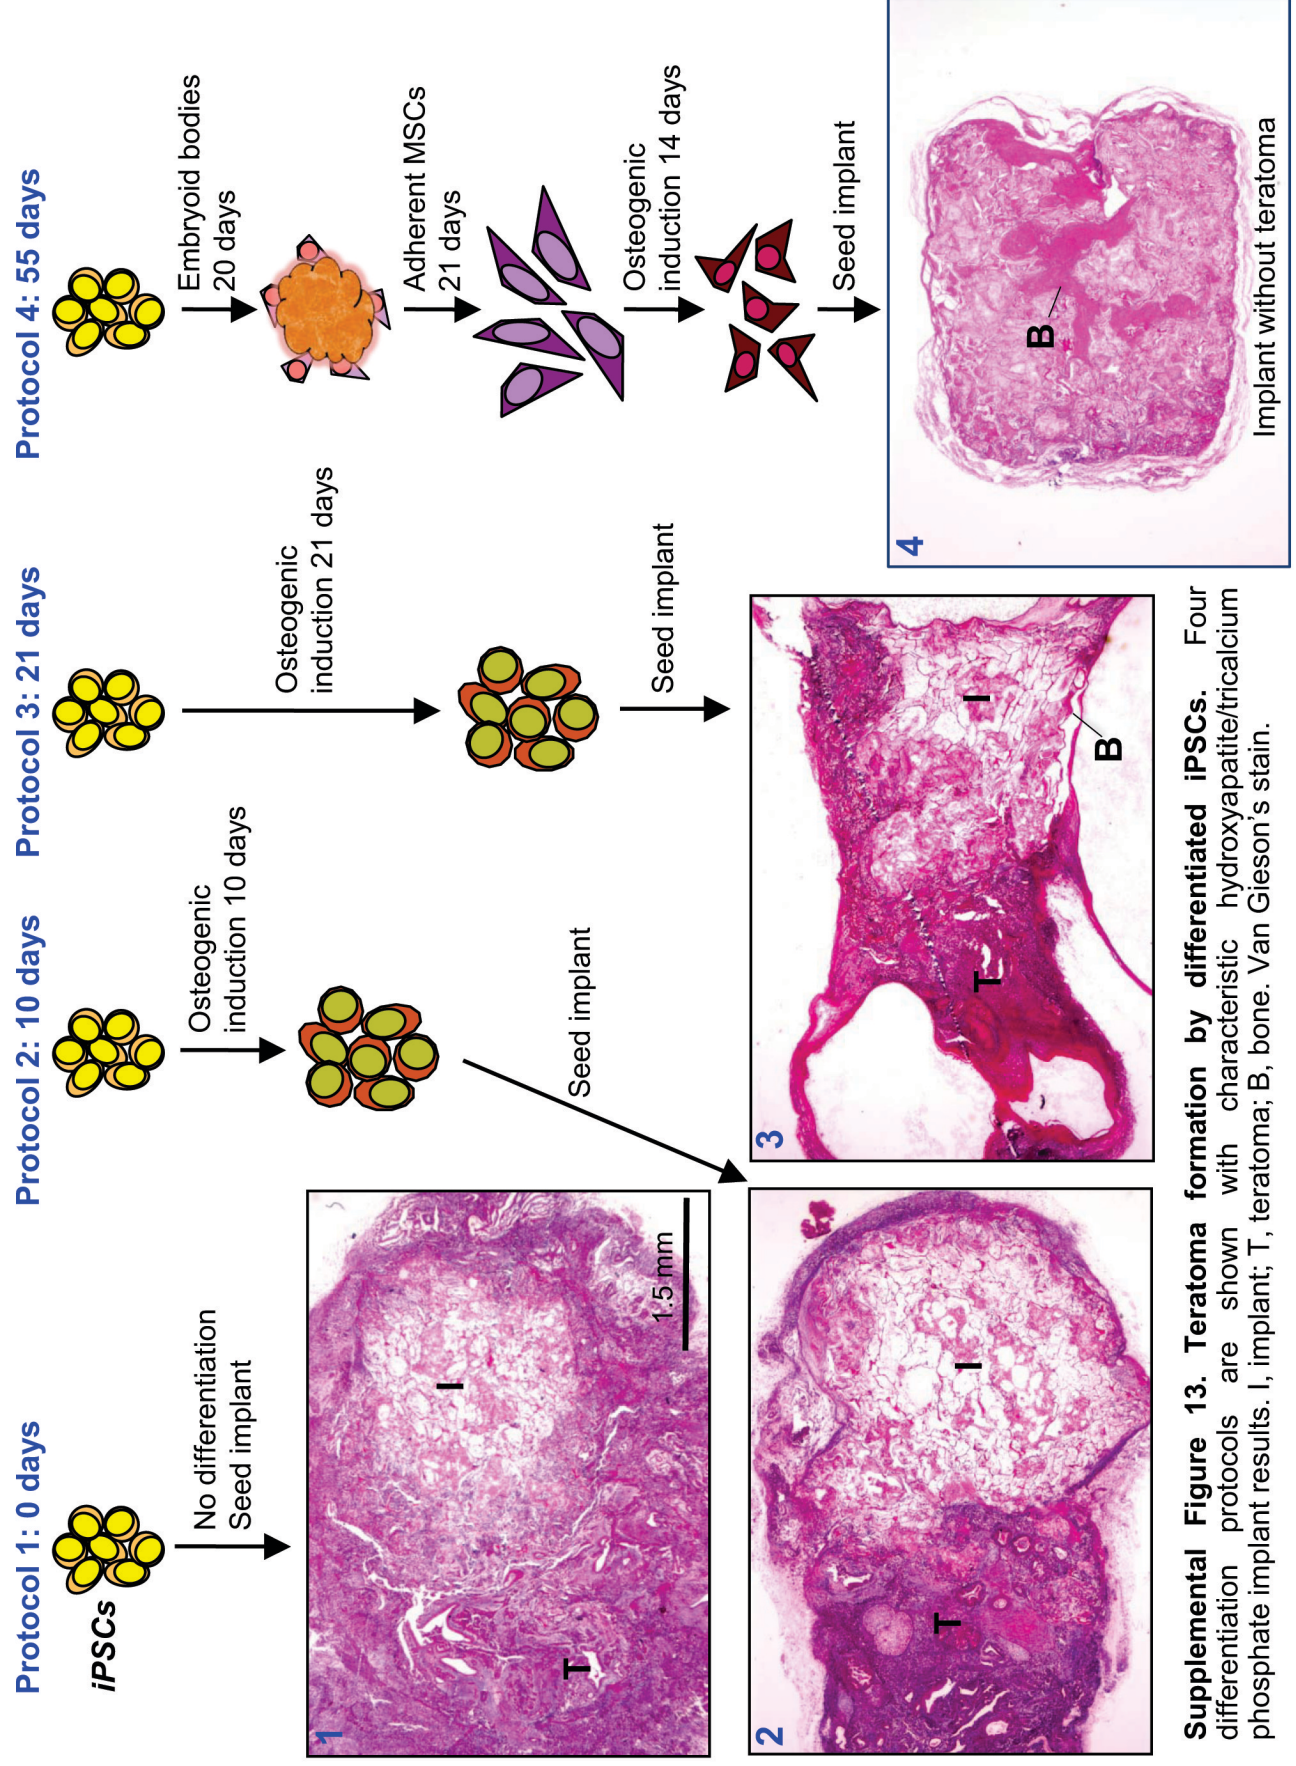

**Supplemental Figure 13. Teratoma formation by differentiated iPSCs.** Four differentiation protocols are shown with characteristic hydroxyapatite/tricalcium phosphate implant results. I, implant; T, teratoma; B, bone. Van Gieson's stain.
